# Supplementary material for: With a Little Help From Change Management
Source: Atypon-hosted journal article supplement (doi:10.1026/0932-4089/a000372), 2021-09-24
Supplement: 0932-4089_a000372_esm1.pdf [file 0932-4089_a000372_esm1.pdf]

Online Supplementary Material for

**With a Little Help From Change Management: Effects of a Short-Term Change Intervention on Employee Attitudes and Behavior**

**Timeline for the procedure (German version)**

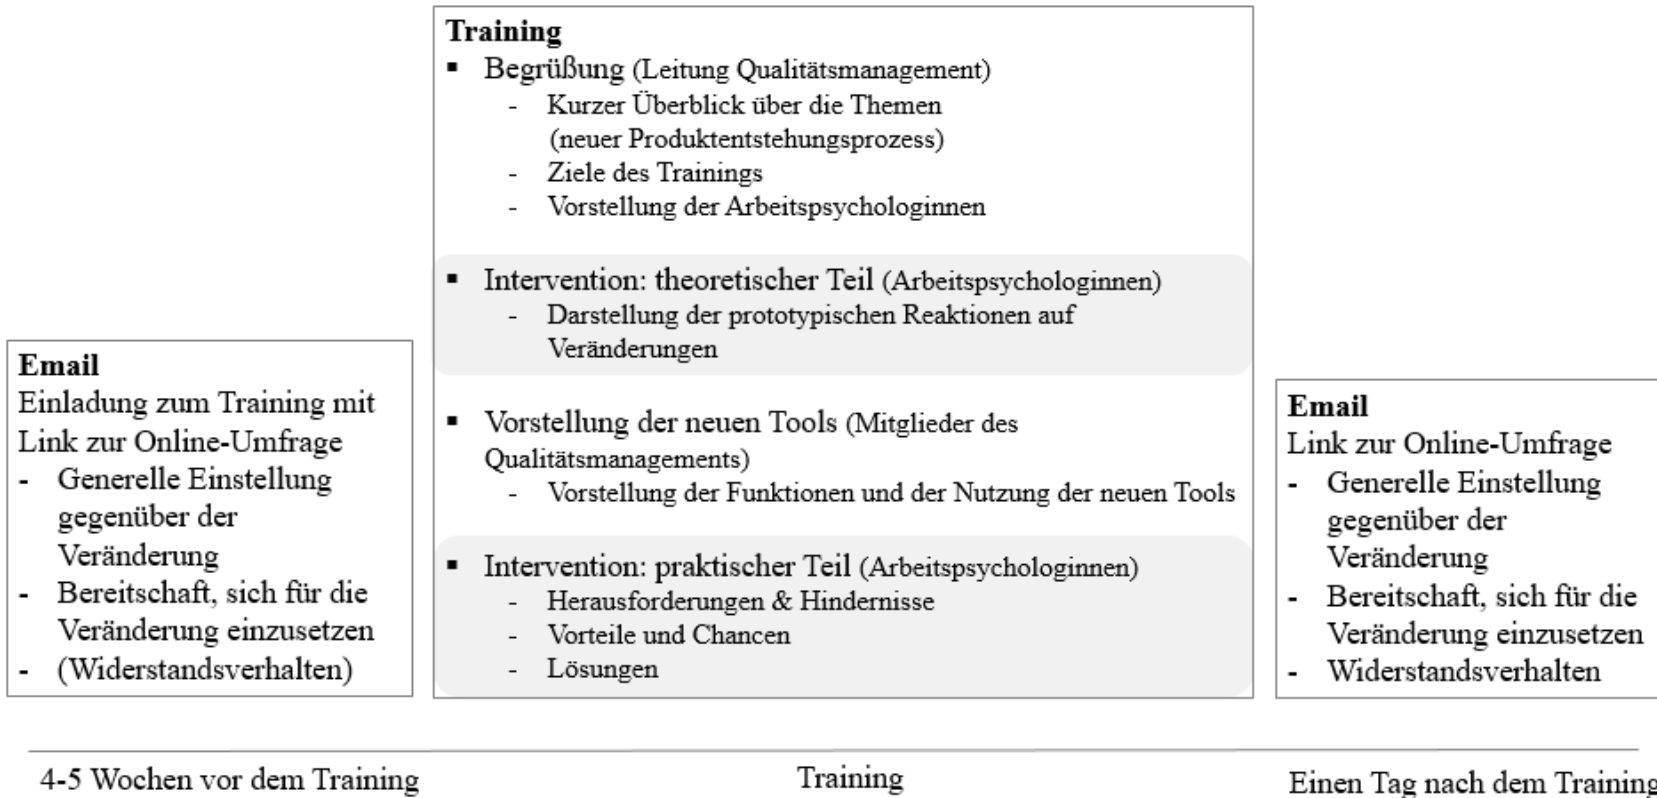

### Time schedule for the change intervention (German version)

| Thema                                                                                                                                                                                                                                                                                                         | Dauer            | Material                                                      |
|---------------------------------------------------------------------------------------------------------------------------------------------------------------------------------------------------------------------------------------------------------------------------------------------------------------|------------------|---------------------------------------------------------------|
| <b>Theoretischer Teil</b>                                                                                                                                                                                                                                                                                     | <b>5 Minuten</b> |                                                               |
| <i>Ziel:</i> Auf das Thema Change-Management einstimmen, über menschliche Reaktionen auf Veränderungen aufklären. Teilnehmende (TN) erhalten Gefühl, dass ihre Reaktion auf Veränderung berechtigt ist.                                                                                                       |                  |                                                               |
| Darstellung der Auswirkungen von Veränderungen auf die beteiligten Beschäftigten (z. B. Prozessveränderungen und neue Arbeitsinhalte aufgrund neuer Technologien)                                                                                                                                             | 1 Minute         |                                                               |
| Vorstellung der Phasen der Reaktionen auf Veränderungen:<br>1. Schock<br>2. Ablehnung<br>3. Gefühl der Inkompetenz<br>4. Akzeptanz<br>5. Ausprobieren/Lernen<br>6. Suche nach dem Sinn/Erkenntnis<br>7. Integration<br>Einzelne Phasen an einem Beispiel erläutern und dann auf den Anwendungsfall übertragen | 4 Minuten        | Abbildung zu Reaktionen auf Veränderungen (siehe Abbildung 1) |

| Thema                                                                                                                                                                                                                                                                                                                                                                                                                                                                                                                                                                                                                                      | Dauer             | Material                                                                               |
|--------------------------------------------------------------------------------------------------------------------------------------------------------------------------------------------------------------------------------------------------------------------------------------------------------------------------------------------------------------------------------------------------------------------------------------------------------------------------------------------------------------------------------------------------------------------------------------------------------------------------------------------|-------------------|----------------------------------------------------------------------------------------|
| <b>Interaktiver Teil</b>                                                                                                                                                                                                                                                                                                                                                                                                                                                                                                                                                                                                                   | <b>45 Minuten</b> |                                                                                        |
| <p><i>Ziel:</i> Teilnehmende erhalten Gefühl, dass ihre Sorgen wahrgenommen und berücksichtigt werden. Der Fokus wird auf positive Aspekte des neuen Prozesses gelenkt. Durch die eigenständige Erarbeitung von Problemlösungen wird das Gefühl von Selbstwirksamkeit gestärkt. Dadurch fühlen sich die Teilnehmenden kompetenter im Umgang mit der neuen Situation.</p>                                                                                                                                                                                                                                                                   |                   |                                                                                        |
| <p>Vorstellung des Ablaufs des interaktiven Teils:<br/>         Neuer Prozess wird aus verschiedenen Perspektiven beleuchtet; dabei wird auf (1) mögliche Herausforderungen/Hindernisse (2) Vorteile/Chancen und (3) Lösungswege eingegangen, um Herausforderungen zu begegnen</p>                                                                                                                                                                                                                                                                                                                                                         | 2 Minuten         |                                                                                        |
| <p><b>1. Phase: Herausforderungen und Hindernisse</b><br/>         Abfrage der Herausforderungen und Hindernisse in Bezug auf die Veränderung</p> <ul style="list-style-type: none"> <li>- Frage 1: „Welche Herausforderungen und Hindernisse sehen Sie in Bezug auf die Veränderung?“ zeigen und rote/orange Moderationskarten verteilen</li> <li>- Stillarbeit:             <ul style="list-style-type: none"> <li>○ TN sollen pro Karte einen Aspekt aufschreiben</li> <li>○ TN sollen nach und nach thematisch gruppiert anpinnen</li> </ul> </li> <li>- Zusammenfassung der benannten Herausforderungen durch Moderator*in</li> </ul> | 15 Minuten        | Flipchart mit Frage 1<br>Rote/orange Moderationskarten<br>Stifte<br>Pinnwand<br>Nadeln |
| <p><b>2. Phase: Vorteile und Chancen</b><br/>         Sammeln von Vorteilen/Chancen des neuen Prozesses für die TN und für das Unternehmen</p> <ul style="list-style-type: none"> <li>- Frage 2: „Welche Chancen und Vorteile sehen Sie?“ zeigen</li> <li>- TN mündlich beantworten lassen und Aspekte auf Flipchart erfassen</li> </ul>                                                                                                                                                                                                                                                                                                   | 8 Minuten         | Flipchart mit Frage 2<br>Flipchartmarker                                               |

---

### 3. Phase: Lösungen

Erarbeiten von Lösungen, um Herausforderungen zu begegnen

- Frage 3: „Welche Lösungsmöglichkeiten sehen Sie?“ zeigen und grüne Moderationskarten verteilen
- Gruppenarbeit:
  - TN in (interdisziplinäre) Gruppen à 4-5 TN aufteilen
  - Jede Gruppe erhält eine Herausforderung aus der ersten Phase
  - TN diskutieren und notieren Lösungsideen auf Moderationskarten
- TN stellen ihre Karten im Plenum vor
- Ergänzungen durch das Plenum erfragen

20 Minuten

Flipchart mit Frage 3

Grüne Moderationskarten

Stifte

Pinnwand

Nadeln

---

**Figure 1**

*Prototypical Reactions to Change (German Version)*

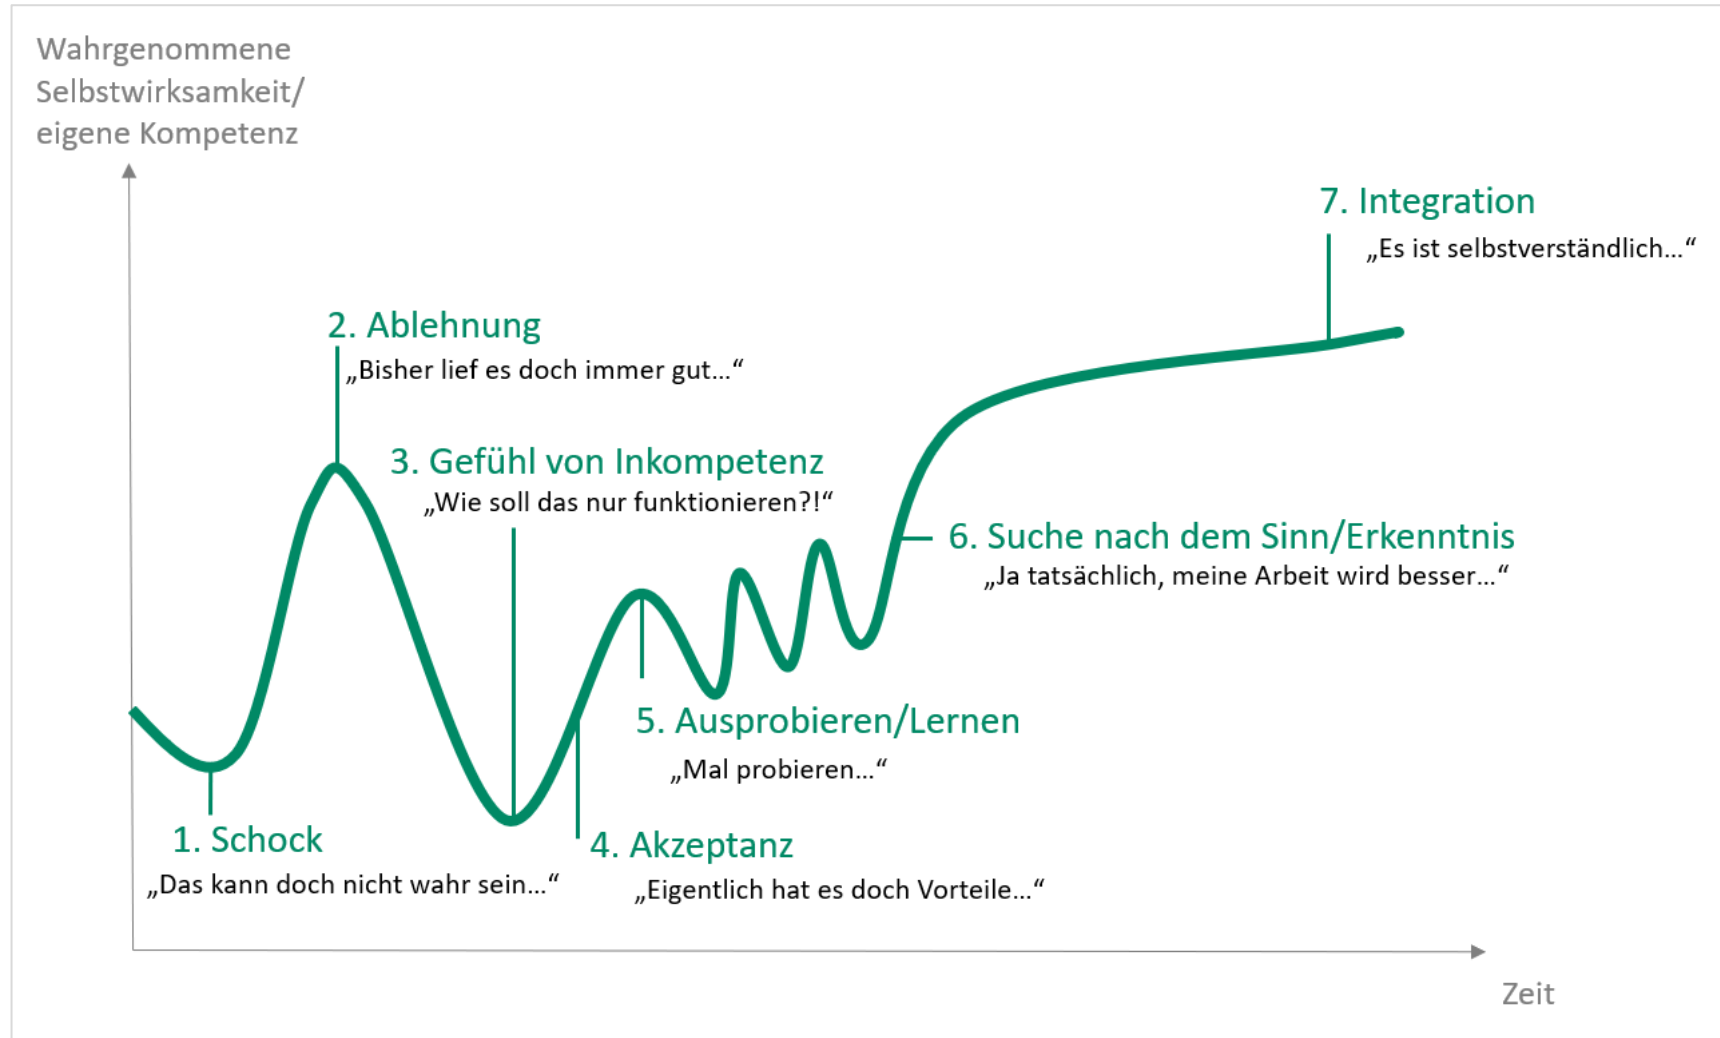

*Note.* Figure is based on Streich, R. K. (2016). *Fit for leadership*. Springer.

## Timeline for the procedure (English version)

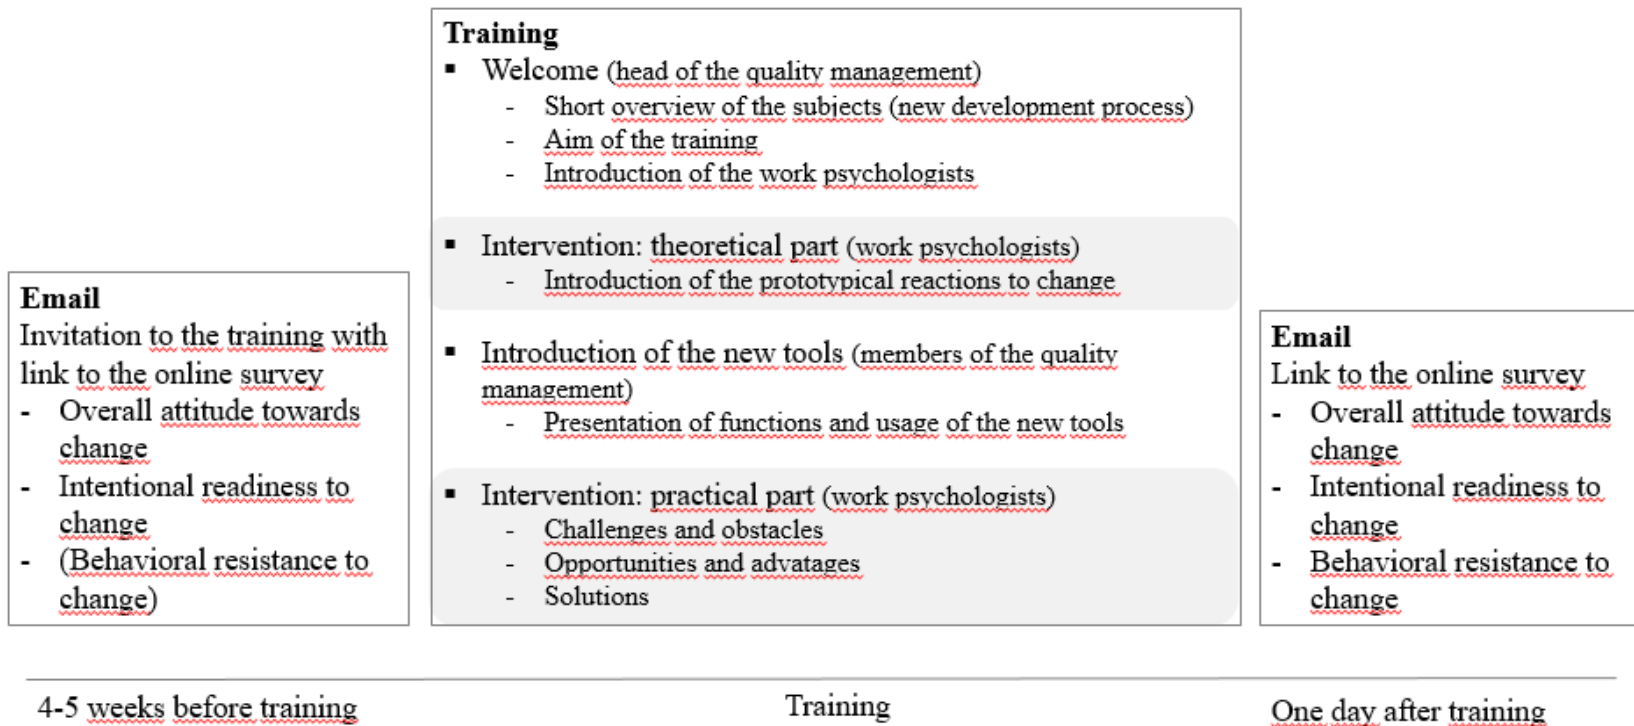

### Time schedule for the change intervention (English version)

| Topic                                                                                                                                                                                                                                                                                      | Time             | Material                                            |
|--------------------------------------------------------------------------------------------------------------------------------------------------------------------------------------------------------------------------------------------------------------------------------------------|------------------|-----------------------------------------------------|
| <b>Theoretical Part</b>                                                                                                                                                                                                                                                                    | <b>5 minutes</b> |                                                     |
| <i>Aim:</i> Introduce participants to the topic of change management, and educate them about human reactions to changes. Participants get the feeling that their reaction to change is justified.                                                                                          |                  |                                                     |
| Present how changes affect the involved employees (e.g., changes in work processes and work content due to new technologies).                                                                                                                                                              | 1 minute         |                                                     |
| Presentation of the phases of reaction to change: <ol style="list-style-type: none"> <li>1. Shock</li> <li>2. Denial</li> <li>3. Feeling of incompetence</li> <li>4. Acceptance</li> <li>5. Testing/learning</li> <li>6. Search for meaning/realization</li> <li>7. Integration</li> </ol> | 4 minutes        | Figure depicting reactions to change (see Figure 2) |
| Explain individual phases with an example and then apply them to the specific use case.                                                                                                                                                                                                    |                  |                                                     |

| Topic                                                                                                                                                                                                                                                                                                                                                                                                                                                                                                                                                                                                            | Time              | Material                                                                                     |
|------------------------------------------------------------------------------------------------------------------------------------------------------------------------------------------------------------------------------------------------------------------------------------------------------------------------------------------------------------------------------------------------------------------------------------------------------------------------------------------------------------------------------------------------------------------------------------------------------------------|-------------------|----------------------------------------------------------------------------------------------|
| <b>Interactive Part</b>                                                                                                                                                                                                                                                                                                                                                                                                                                                                                                                                                                                          | <b>45 minutes</b> |                                                                                              |
| <i>Aim:</i> Participants get the feeling that their concerns are recognized and considered. The focus is on positive aspects of the new process. The feeling of self-efficacy is strengthened by the independent development of problem solutions. As a consequence, the participants feel more competent in dealing with the new situation.                                                                                                                                                                                                                                                                     |                   |                                                                                              |
| Presentation of the interactive part:<br>The new process will be examined from different perspectives. In doing so, (1) possible challenges/obstacles, (2) opportunities/advantages, and (3) solutions to meet the challenges are discussed.                                                                                                                                                                                                                                                                                                                                                                     | 2 minutes         |                                                                                              |
| <b>1st phase: challenges and obstacles</b><br>Collection of challenges and obstacles related to the change <ul style="list-style-type: none"> <li>- Show question 1: “Which challenges and obstacles do you see in relation to the change?” and hand out red/orange moderation cards</li> <li>- Work in silence:               <ul style="list-style-type: none"> <li>o Participants are asked to write down one aspect per card</li> <li>o Participants are asked to pin their cards one after another, grouped thematically</li> </ul> </li> <li>- Summary of the named challenges by the moderator</li> </ul> | 15 minutes        | Flip chart with question 1<br>Red/orange moderation cards<br>Markers<br>Pinboard<br>Pushpins |
| <b>2nd phase: opportunities and advantages</b><br>Collection of advantages and opportunities of the new process for the participants and for the company <ul style="list-style-type: none"> <li>- Show question 2: “Which opportunities and advantages do you see?”</li> <li>- Participants answer orally, moderator records aspects on flip chart</li> </ul>                                                                                                                                                                                                                                                    | 8 minutes         | Flip chart with question 2<br>Flip chart marker                                              |



---

**3rd phase: solutions**

20 minutes

Flip chart with question 3

Development of solutions to meet challenges

Green moderation cards

- Show question 3: “Which possible solutions do you see?” and hand out green moderation cards
- Group work:
  - Divide participants into (interdisciplinary) groups of 4–5 participants
  - Each group receives a challenge from the first phase
  - Participants discuss and note down ideas for solutions on moderation cards
- Participants present their cards in the plenum
- Ask the plenum for additions

Markers

Pinboard

Pushpins

---

**Figure 2**

*Prototypical Reactions to Change (English Version)*

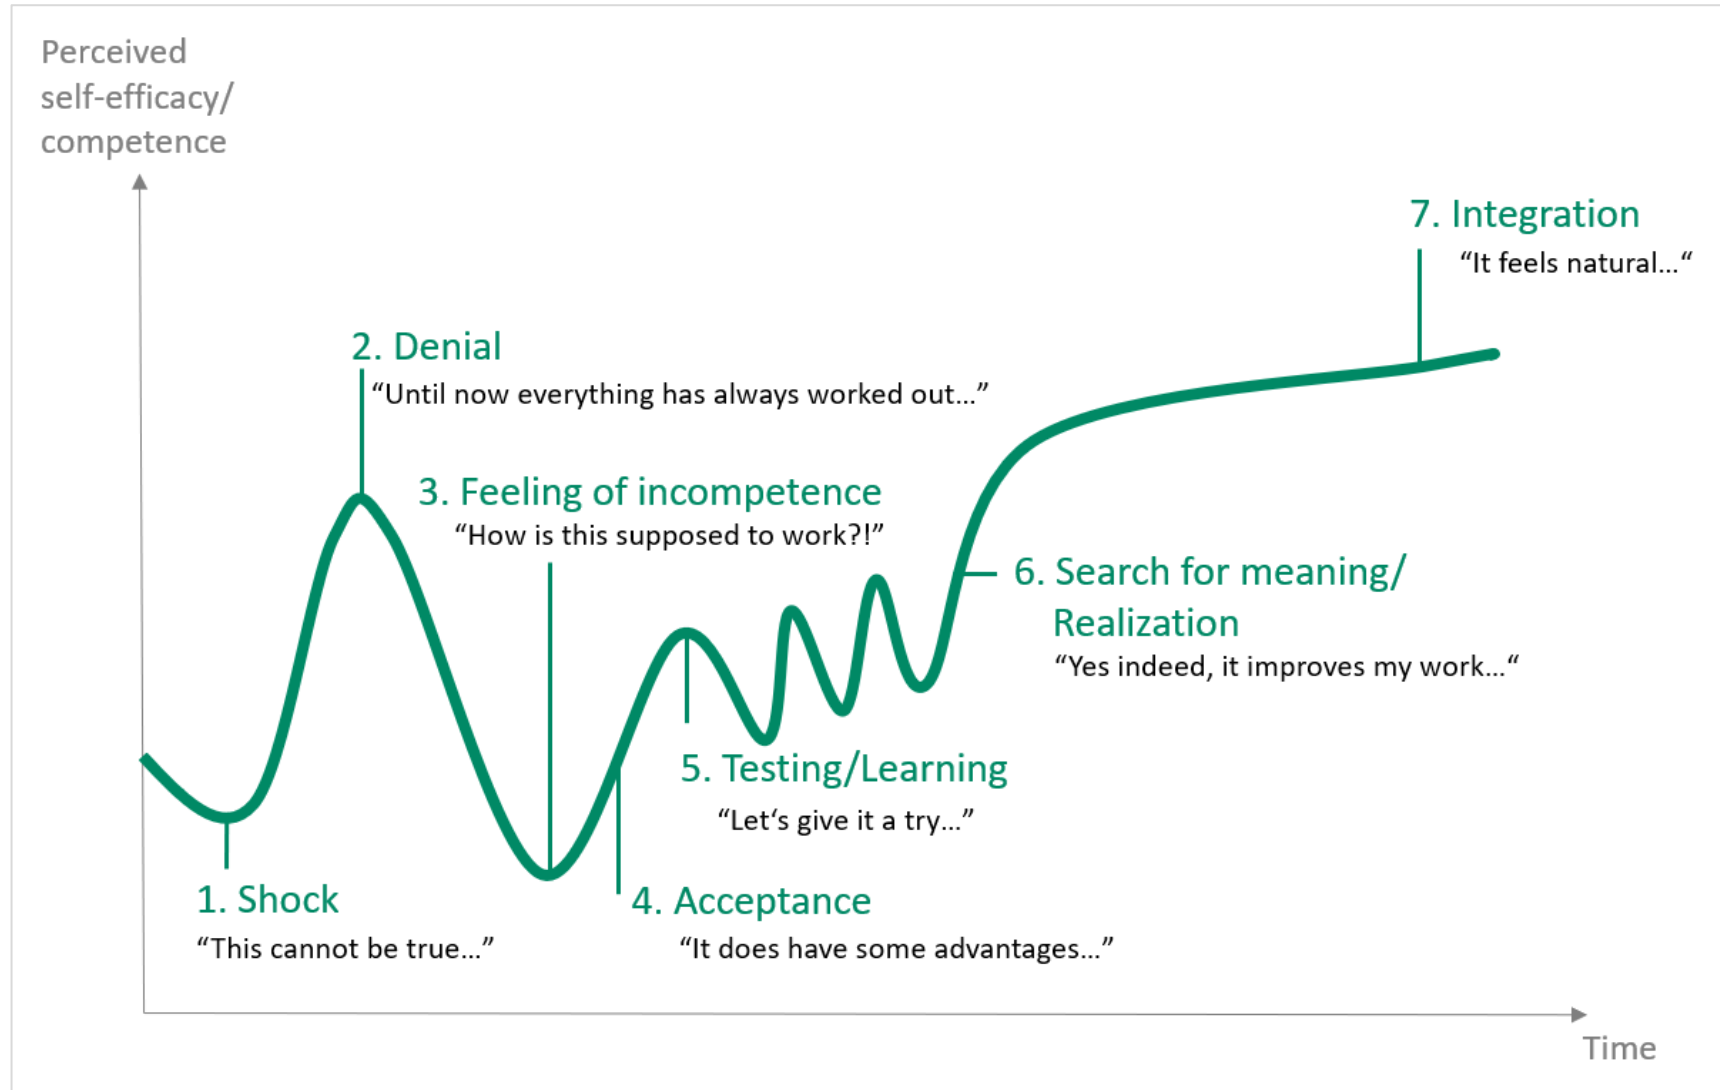

*Note.* Figure is based on Streich, R. K. (2016). *Fit for leadership*. Springer.
